# Supplementary material for: Metabolic assessment of cerebral palsy with normal clinical MRI using 18F-FDG PET imaging: A preliminary report
Source: Front Neurol. 2022 Sep 15;13:844911. doi: 10.3389/fneur.2022.844911 (PMC9520285; doi:10.3389/fneur.2022.844911)
Supplement: Supplementary file 1 [file Table_1.XLS]

## Sheet: data
S号码	Basal ganglia		Central region		Cerebellum		Cingulate and paracingulate gyri		Frontal lobe		Mesial temporal lobe		Occipital lobe		Parietal lobe		Temporal lobe
	L	R	L	R	L	R	L	R	L	R	L	R	L	R	L	R	L	R
	SUVmean	SUVmean	SUVmean	SUVmean	SUVmean	SUVmean	SUVmean	SUVmean	SUVmean	SUVmean	SUVmean	SUVmean	SUVmean	SUVmean	SUVmean	SUVmean	SUVmean	SUVmean	GMFC
S0001	3.49	3.74	2.86	2.75	2.74	2.77	3.13	3.24	3.39	3.46	2.76	2.85	2.62	2.77	2.47	2.63	3.46	3.59	5
S0002	4.04	3.23	5.52	4.96	3.57	4.24	4.9	4.4	4.89	5.34	3.26	5	4.99	5.5	5.46	5.33	4.21	5.46	5
S0003	3.67	4.13	5.82	5.97	4.91	4.25	5.11	5.08	4.75	4.9	4.04	4.03	5.2	5.18	5.38	5.3	5.08	5.44	2
S0004	3.29	3.41	5.47	5.24	2.87	2.72	5.43	5.39	4.42	4.37	4.48	4.08	5.37	5.37	5.36	5.49	5.09	5.14	5
S0005	5.04	5.04	4.93	4.97	3.49	3.37	5.53	5.55	5.5	5.19	3.24	3.21	5.27	5.77	5.45	5.73	5.18	5.15	4
S0006	3.44	2.74	3.13	3.13	2.37	2.25	3.02	2.91	3.71	3.43	1.96	2.07	3.54	3.35	3.73	3.67	3.5	2.82	5
S0007	3.2	3.23	3.17	3.14	2.25	2.19	3.2	3.2	4.16	4.23	3.35	3.26	4.22	4.22	4.17	4.18	3.23	3.28	4
S0008	4.55	4.98	5.18	4.67	4.1	3.67	5.26	5.33	5.98	5.63	3.21	3.27	5.25	5.38	5.28	5.17	5.15	5.08	4
S0009	5.03	4.78	5.77	5.61	3.77	3.72	5.25	5.81	6.05	5.87	3.52	3.55	5.51	5.48	5.69	5.47	5.63	5.58	4
S0010	4.39	4.32	4.15	4.25	2.52	2.52	4.55	4.28	4.59	4.37	2.81	2.83	4.43	4.65	4.26	4.52	4.28	4.32	4
S0011	3.03	3.89	4.86	4.58	2.8	2.56	4.59	4.52	4.87	4.68	2.75	2.98	4.13	4.37	4.85	4.83	4.67	4.63	4
S0012	5.16	5.12	5.75	5.41	3.89	3.86	4.88	4.49	5.39	5.31	3.51	3.39	5.62	5.62	5.53	5.54	5.58	5.56	4
S0013	4.15	4.03	4.38	4.15	2.61	2.53	4.35	4.18	4.39	4.19	2.73	2.67	4.58	4.41	4.44	4.33	4.13	4.01	5
S0014	4.6	4.76	4.65	4.47	3.1	2.76	4.33	4.27	4.6	4.49	2.75	3.07	4.78	4.78	4.67	4.61	4.24	4.29	4
S0015	3.07	3.08	3.33	3.26	2.09	2.01	3.36	3.42	3.25	3.24	2.41	2.46	3.47	3.32	3.38	3.3	3.19	3.24	5
S0016	3.4	3.41	3.7	3.57	2.33	2.12	3.55	3.45	3.54	3.51	2.59	2.67	3.72	3.77	3.66	3.69	3.6	3.57	2
S0017	5.32	5.19	5.1	5.08	3.16	2.98	5.2	5.36	5.47	5.3	3.34	3.45	5.68	5.7	5.54	5.46	4.88	4.84	3
S0018	4.37	4.27	4.82	4.46	2.85	2.63	4.53	4.4	4.73	4.3	2.97	2.97	4.92	4.84	5.03	4.67	4.65	4.41	3
S0019	4.92	5.44	5.59	5.28	4.67	4.12	5.53	5.79	6.23	6.03	3.67	3.76	5.99	6.03	5.92	5.62	5.78	5.86	3
S0020	4.54	5.03	5.69	5.77	3.16	3.4	5.45	5.51	5.7	5.78	3.26	3.33	5.01	5.46	6.09	6.2	5.21	5.65	5
S0021	5.05	5.08	5.69	5.34	3.8	3.63	5.06	4.51	5.47	5.26	3.39	3.29	6.03	6.04	5.72	5.52	5.64	5.51	4
S0022	4.14	4.52	5.01	5	3.27	3.08	5.05	4.97	5.58	5.64	3.04	3.02	5.38	5.52	5.77	5.68	4.49	4.83	5
S0023	5.06	4.93	5.11	4.77	3.01	2.84	4.72	4.52	4.85	4.74	3.17	3.06	4.83	4.72	4.94	4.75	4.7	4.53	4
S0024	4.79	4.74	4.58	4.42	2.5	2.36	4.4	4.26	4.64	4.54	2.76	2.72	4.73	4.73	4.7	4.82	4.55	4.57	3
S0025	4.82	6.62	8.42	8.1	5.18	4.54	7.93	7.61	8.44	8.25	4.75	5.22	7.81	8	8.79	8.37	8.54	8.27	2
S0026	4.55	4.3	4.39	4.52	3.1	3.06	4.56	4.64	4.25	4.14	3.61	3	4.99	4.85	4.66	4.1	4.13	4.01	4
S0027	4.99	4.03	4.87	4.35	2.05	2.74	4.34	4.77	4.14	4.24	2.27	2.24	4.07	4.88	4.91	4.42	4.01	4.02	5
S0028	4.41	4.26	4.93	4.71	3.24	3.05	5.01	4.8	5.14	5.04	3.07	2.83	5.03	5.06	5.28	5.1	5.05	4.87	2
S0029	8.91	9.08	9.88	9.56	6.19	5.86	9.23	9.34	9.92	9.92	6.48	6.34	10.44	10.38	10.7	10.09	9.79	9.53	3
S0030	5.78	6.01	7.07	7.21	3.89	3.47	6.56	6.54	7.31	7.02	4.37	4.4	7.79	7.54	7.37	7.24	7.16	7.12	2
S0031	3.15	3.31	3.79	3.76	2.48	2.33	3.91	3.71	3.88	3.92	2.4	2.67	4.51	4.86	4.16	4.03	3.85	4.06	3
	Asymmetry index (%)	{(L-R)/［(L+R)/2］}
	-6.91563		3.92157		-1.08893		-3.45369		-2.0438		-3.20856		-5.56586		-6.27451		-3.68794
	22.2834		10.687		-17.1575		10.7527		-8.79765		-42.1308		-9.72355		2.40964		-25.8532
	-11.7949		-2.54453		14.4105		0.588813		-3.10881		0.247831		0.385356		1.49813		-6.84411
	-3.58209		4.29505		5.36673		0.739372		1.13766		9.34579		0		-2.39631		-0.977517
	0		-0.808081		3.49854		-0.361011		5.79981		0.930233		-9.05797		-5.00894		0.580833
	22.6537		0		5.19481		3.70995		7.84314		-5.45906		5.51524		1.62162		21.519
	-0.933126		0.950872		2.7027		0		-1.66865		2.72315		0		-0.239521		-1.5361
	-9.02413		10.3553		11.0682		-1.322		6.02929		-1.85185		-2.44591		2.10526		1.36852
	5.09684		2.81195		1.33511		-10.1266		3.02013		-0.848656		0.545951		3.94265		0.892061
	1.60735		-2.38095		0		6.11552		4.91071		-0.70922		-4.84581		-5.92255		-0.930233
	-24.8555		5.9322		8.95522		1.53677		3.97906		-8.02792		-5.64706		0.413223		0.860215
	0.77821		6.09319		0.774194		8.32444		1.49533		3.47826		0		-0.180668		0.359066
	2.93399		5.39273		3.11284		3.98593		4.662		2.22222		3.78198		2.50855		2.9484
	-3.4188		3.94737		11.6041		1.39535		2.42024		-10.9966		0		1.2931		-1.17233
	-0.325203		2.12443		3.90244		-1.76991		0.308166		-2.05339		4.41826		2.39521		-1.55521
	-0.293686		3.57634		9.4382		2.85714		0.851064		-3.04183		-1.33511		-0.816327		0.83682
	2.47383		0.392927		5.86319		-3.0303		3.15692		-3.24006		-0.351494		1.45455		0.823045
	2.31481		7.75862		8.0292		2.91153		9.52381		0		1.63934		7.42268		5.29801
	-10.0386		5.70377		12.5142		-4.59364		3.26264		-2.42261		-0.665557		5.19931		-1.37457
	-10.2403		-1.39616		-7.31707		-1.09489		-1.39373		-2.12443		-8.59599		-1.79007		-8.10313
	-0.5923		6.34633		4.57604		11.4943		3.91426		2.99401		-0.1657		3.55872		2.33184
	-8.77598		0.1998		5.98425		1.59681		-1.06952		0.660066		-2.56881		1.57205		-7.29614
	2.6026		6.88259		5.81197		4.329		2.29406		3.5313		2.30366		3.92157		3.68364
	1.04932		3.55556		5.76132		3.23326		2.17865		1.45985		0		-2.52101		-0.438596
	-31.4685		3.87409		13.1687		4.1184		2.27681		-9.42828		-2.40354		4.8951		3.21237
	5.64972		-2.91807		1.2987		-1.73913		2.62217		18.4569		2.84553		12.7854		2.9484
	21.286		11.2798		-28.81		-9.44018		-2.38663		1.33038		-18.1006		10.5038		-0.249066
	3.46021		4.56432		6.04134		4.28135		1.96464		8.13559		-0.594648		3.46821		3.62903
	-1.88994		3.29218		5.47718		-1.18471		0		2.18409		0.576369		5.86821		2.69151
	-3.90161		-1.96078		11.413		0.305344		4.04745		-0.684151		3.26158		1.7796		0.560224
	-4.95356		0.794702		6.23701		5.24934		-1.02564		-10.6509		-7.47065		3.1746		-5.30973
